# Acute depletion of plasma membrane phosphatidylinositol 4,5-bisphosphate impairs specific steps in endocytosis of the G-protein-coupled receptor

Dániel J. Tóth, József Tóth, Gerg Gulyás, András Balla, Tamas Balla, László Hunyady and Péter Várnai

*Journal of Cell Science* 125, 3013  
© 2012. Published by The Company of Biologists Ltd  
doi: 10.1242/jcs.115048

There was an error published in *J. Cell Sci.* **125**, 2185–2197.

In Fig. 5A the viral T2A protein sequence was given incorrectly. The correct figure is as shown below:

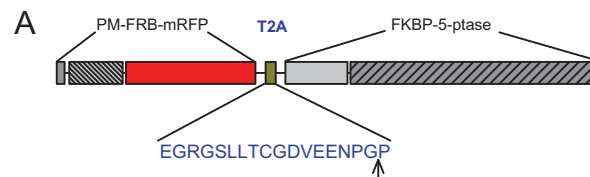

The authors apologise for this error.
